# Supplementary material
Source: publisher figshare collection journal article supplement (https://future-science-group.figshare.com/ndownloader/files/35127976)
Supplement: Supplementary file 1 [file 35127976]

## Sheet: Supplementary Data 3 altered m6
Gene Name	Fold_Change	Up_Down Regulation	chromosome	Peak Start	Peak End	p-value
Clip3	29.2426	Down	Chr1	88750551	88755076	0.00131826
Phyhip	16.2234	Down	Chr15	52156893	52158400	0.00120226
Zfp110	14.3204	Down	Chr1	65757212	65757461	0.0234423
Wbp11	13.8326	Down	Chr4	170779814	170783166	2.88403e-08
Grin2d	10.8528	Down	Chr1	101856649	101856800	0.0102329
Acr	7.01285	Down	Chr7	130547955	130548106	0.00446684
Nr2f1	6.72717	Down	Chr2	5579695	5579894	0.00660693
Tsen34	5.9794	Down	Chr1	64029316	64029597	0.0263027
Trim67	5.61778	Down	Chr19	57555660	57555810	0.0102329
Hnrnpc	4.69134	Down	Chr15	28489996	28498102	7.58578e-05
Ewsr1	4	Down	Chr14	85322672	85325291	1.04713e-08
Eno2	3.75809	Down	Chr4	157290589	157291945	0.00263027
Bcl11b	3.68075	Down	Chr6	131837986	131838137	0.047863
Tmem267	3.4822	Down	Chr2	52362312	52364886	0.000436516
Wnt8b	3.45815	Down	Chr1	264265636	264265786	0.00467735
Ky	3.43426	Down	Chr8	111021768	111022018	0.000138038
Rdh12	3.43426	Down	Chr6	102405405	102405553	0.018197
Cenpt	3.38698	Down	Chr19	37813382	37813659	0.025704
Pdxdc1	3.36359	Down	Chr10	3242346	3242925	0.00144544
Synpo2l	3.11666	Down	Chr15	4073302	4073453	0.0234423
Rtp4	3.09513	Down	Chr11	80644024	80644223	0.00776247
Cacna1a	2.9897	Down	Chr19	25526813	25527014	0.0128825
Tnfaip8	2.96905	Down	Chr18	44779664	44779814	0.000229087
Il31ra	2.92817	Down	Chr2	44336136	44336386	0.0165959
Sectm1a	2.88786	Down	Chr10	110264127	110264574	0.0436516
Glyctk	2.86791	Down	Chr8	114848247	114848397	0.00186209
Nat8f5	2.77022	Down	Chr4	117506977	117507274	0.00030903
Ndufaf7	2.77022	Down	Chr6	1545283	1545434	6.30957e-06
Lrrc66	2.73208	Down	Chr14	37153143	37153343	0.0229087
Sox14	2.73208	Down	Chr8	108108807	108108957	0.0501187
Adamts7	2.69447	Down	Chr8	97568678	97568979	0.0467735
Haus1	2.69447	Down	Chr18	74140856	74141005	0.00501187
Pcdh12	2.69447	Down	Chr18	31428269	31428469	0.0338844
Npffr1	2.63902	Down	Chr20	31246559	31246810	0.00489779
Cbfa2t3	2.62079	Down	Chr19	55441487	55441637	0.0380189
Lrrtm4	2.58471	Down	Chr4	110705134	110705384	0.000354813
Sorcs1	2.58471	Down	Chr1	269966271	269966471	0.000724436
Kcnh1	2.54912	Down	Chr13	111229093	111229244	0.0104713
Pcdhb5	2.51403	Down	Chr18	30400446	30400596	0.0281838
Bcl6b	2.49666	Down	Chr10	56835498	56835795	8.31764e-06
St14	2.47942	Down	Chr8	32240457	32241625	0.0042658
Prss53	2.46229	Down	Chr1	199331305	199331504	0.00131826
Rufy4	2.46229	Down	Chr9	81408956	81409155	0.0363078
Usp51	2.46229	Down	ChrX	19272953	19273303	0.017378
Kdm2a	2.44528	Down	Chr1	219566379	219566529	0.00616595
Ssc5d	2.44528	Down	Chr1	72451768	72452049	0.00954993
Rabif	2.42839	Down	Chr13	51317574	51329242	0.0363078
Cartpt	2.41162	Down	Chr2	30125297	30125494	0.00891251
Dapp1	2.41162	Down	Chr2	243176874	243177022	0.0223872
Ubxn11	2.41162	Down	Chr5	152356136	152356597	2.63027e-05
Mzf1	2.39496	Down	Chr1	65521024	65522151	0.020893
Prr18	2.36199	Down	Chr1	52994495	52994744	0.040738
C1qtnf7	2.34567	Down	Chr14	72011616	72011916	0.000218776
Hacd1	2.34567	Down	Chr17	81173433	81173776	0.00446684
Phldb2	2.34567	Down	Chr11	57430890	57442482	0.0151356
Zbtb6	2.32947	Down	Chr3	21679230	21679381	0.00123027
Hoxa3	2.31338	Down	Chr4	82141068	82141219	0.0416869
Slc16a4	2.31338	Down	Chr2	210055911	210056159	0.00239883
Mtus2	2.28153	Down	Chr12	8114295	8116093	0.00074131
Vps13d	2.26577	Down	Chr5	162891500	162891651	0.0144544
Polr3c	2.23457	Down	Chr2	198836330	198836480	0.0295121
Zfp521	2.21914	Down	Chr18	5030965	5031513	0.00616595
Foxq1	2.20381	Down	Chr17	34226244	34226544	0.00912011
Gpr45	2.20381	Down	Chr9	49838610	49838810	0.0213796
Ccdc3	2.17347	Down	Chr17	76995020	76995171	0.0501187
Cenpj	2.17347	Down	Chr15	36757021	36757171	0.0295121
Rapgef1	2.17347	Down	Chr3	8306677	8307027	0.00017378
Zranb1	2.17347	Down	Chr1	204999863	205000113	5.7544e-05
Maff	2.15846	Down	Chr7	120591105	120591403	2.39883e-05
Ccdc171	2.12874	Down	Chr5	101855598	101906905	0.0141254
Synm	2.11404	Down	Chr1	128692161	128692411	0.00186209
Usp49	2.09943	Down	Chr9	15314974	15315523	2.18776e-05
Ankrd45	2.08493	Down	Chr13	78998975	78999224	0.00169824
Ddc	2.08493	Down	Chr14	91909153	91909353	0.00371535
Erfe	2.08493	Down	Chr9	98511258	98511509	0.0446684
Frem3	2.08493	Down	Chr19	31027011	31027310	0.0371535
Grm3	2.07053	Down	Chr4	21567361	21567561	0.00954993
Slc27a6	2.07053	Down	Chr18	53609643	53609939	0.0354813
Tmem150b	2.07053	Down	Chr1	72701533	72701732	0.00912011
Gpd2	2.05623	Down	Chr3	43355622	43355773	0.0123027
Lrch1	2.05623	Down	Chr15	56785295	56785445	0.00436516
Synpo	2.05623	Down	Chr18	55869474	55869774	0.00190546
Wdr31	2.05623	Down	Chr5	78305623	78307550	0.00676083
Catsperg1	2.04202	Down	Chr1	88131381	88131682	0.0251189
Igsf23	2.04202	Down	Chr1	80851030	80851378	2.23872e-05
Wwc1	2.04202	Down	Chr10	20663343	20663493	0.000660693
Brms1	2.02792	Down	Chr1	220330289	220330540	0.00186209
Erich6	2.02792	Down	Chr2	148838024	148849675	0.0158489
Ints6l	2.02792	Down	ChrX	158886459	158886956	7.76247e-05
Phf7	2.02792	Down	Chr16	7323625	7323823	0.00354813
Zc2hc1c	2.02792	Down	Chr6	109112171	109112567	0.00549541
Cd2ap	2.01391	Down	Chr9	20831265	20839038	0.00331131
Hoxa2	2.01391	Down	Chr4	82130885	82131182	0.017378
Abcc5	2	Down	Chr11	84429685	84429884	6.60693e-05
Ccdc71	2	Down	Chr8	117251373	117251523	0.0204174
Mr1	2	Down	Chr13	72772091	72773806	0.0204174
Ints10	1.99861	Down	Chr16	22616928	22617179	0.00645654
Mthfs	1.99861	Down	Chr8	96613938	96614088	0.0275423
Ep300	1.99723	Down	Chr7	122888755	122888906	0.00109648
Zfhx3	1.99723	Down	Chr19	42754032	42754433	6.0256e-05
Duxbl1	1.9917	Down	Chr16	3756607	3756757	0.0501187
Cdkl1	1.99032	Down	Chr6	92100676	92121225	0.00630957
Cdv3	1.98894	Down	Chr8	111849699	111849948	0.0144544
Nt5c2	1.98343	Down	Chr1	266654161	266654710	0.00245471
Fbxo42	1.9752	Down	Chr5	159726879	159727030	0.0269153
Casc1	1.97383	Down	Chr4	179470412	179476915	0.00346737
Krt25	1.97383	Down	Chr10	87238358	87238609	0.0295121
Dio2	1.96973	Down	Chr6	114475304	114475553	0.00371535
Heatr5a	1.967	Down	Chr6	72648753	72649054	0.0380189
Scx	1.96156	Down	Chr7	117520747	117520945	0.00758578
Sox12	1.9602	Down	Chr3	147864422	147864859	0.000562341
Camk4	1.95342	Down	Chr18	25974316	25974466	0.0190546
Tab3	1.95206	Down	ChrX	54090032	54090183	0.0213796
Arrdc1	1.94261	Down	Chr3	2129974	2130124	0.0218776
Pcid2	1.93992	Down	Chr16	81782800	81782949	0.047863
Lmo3	1.93724	Down	Chr4	173005232	173005382	0.00186209
Tia1	1.93321	Down	Chr4	118237997	118238196	0.0301995
Apip	1.92786	Down	Chr3	92997554	92997804	0.0199526
Higd1b	1.91853	Down	Chr10	90930028	90930174	0.0134896
Nol4	1.9172	Down	Chr18	13686705	13740403	0.018197
Rbp4	1.9172	Down	Chr1	256806523	256806666	0.017378
Sema4f	1.9172	Down	Chr4	113738274	113738424	0.0316228
Prim2	1.90924	Down	Chr9	38744759	38744909	0.00245471
Rnf144b	1.90924	Down	Chr17	17817171	17817370	0.0134896
Kctd20	1.9066	Down	Chr20	6222125	6222274	4.57088e-05
Dpm1	1.90528	Down	Chr3	164968034	164969150	1.09648e-07
Cdh20	1.90264	Down	Chr13	24913964	24914164	0.00549541
Ribc1	1.89605	Down	ChrX	21702026	21702414	0.0151356
Synb	1.89605	Down	Chr15	51175480	51175678	0.0501187
Ccnf	1.89212	Down	Chr10	13595081	13595577	0.0234423
Dnajc19	1.88949	Down	Chr2	120530043	120530193	0.00912011
Ubap1l	1.88949	Down	Chr8	70895424	70895673	0.0123027
Comtd1	1.88688	Down	Chr15	2633265	2633462	0.0162181
Ccnl2	1.88035	Down	Chr5	173264027	173264277	2.34423e-05
Brd3	1.87774	Down	Chr3	5995303	5995453	0.0354813
Adra1a	1.87644	Down	Chr15	43398164	43398314	0.01
Sertad4	1.87514	Down	Chr13	111575736	111575985	0.00446684
Klhdc1	1.87254	Down	Chr6	91568239	91582880	0.0057544
Bdh1	1.87125	Down	Chr11	72613206	72619238	0.0165959
Vps13b	1.86736	Down	Chr7	74717632	74721094	0.00204174
Fkbp11	1.86607	Down	Chr7	140398350	140399987	0.0158489
Spata24	1.86348	Down	Chr18	28446943	28454525	6.45654e-05
Chaf1b	1.85961	Down	Chr11	34117543	34117889	0.00281838
Trappc2l	1.85703	Down	Chr19	55427014	55427709	0.0245471
Kcng2	1.85446	Down	Chr18	76808393	76808743	0.000239883
Zfp148	1.85318	Down	Chr11	70513707	70514058	0.0134896
Prr3	1.85061	Down	Chr20	3300344	3305178	0.00199526
Enkur	1.84805	Down	Chr17	88095154	88095300	0.018197
Gfod2	1.84805	Down	Chr19	37682831	37683032	0.00562341
Ccdc153	1.84548	Down	Chr8	48571406	48574131	2.04174e-05
Catsper2	1.84421	Down	Chr3	113360879	113362893	0.00218776
Fnbp1l	1.84421	Down	Chr2	226707757	226710630	0.00489779
Lig4	1.84293	Down	Chr16	85339096	85339396	0.00288403
Whamm	1.84165	Down	Chr1	143426029	143427801	0.000660693
Fam83d	1.8391	Down	Chr3	155287975	155288269	0.00489779
Ankrd66	1.83655	Down	Chr9	20013798	20014398	3.80189e-05
Wbp1	1.83655	Down	Chr4	113952511	113953700	0.00338844
Bid	1.83401	Down	Chr4	153450453	153463748	0.0158489
Ube3a	1.83401	Down	Chr1	116675878	116676087	0.0151356
Fam180a	1.83274	Down	Chr4	62845839	62846184	0.00047863
Pcnt	1.83274	Down	Chr20	13019325	13019635	0.0245471
Zmat4	1.83274	Down	Chr16	72765751	72810566	0.0380189
Rslcan18	1.83147	Down	Chr2	122870547	122870798	0.020893
Smc6	1.83147	Down	Chr6	36959630	36963241	0.00199526
Vipr2	1.82893	Down	Chr6	144005243	144005493	0.0389045
Msl2	1.82513	Down	Chr8	109479451	109479600	0.00204174
Mtif2	1.82513	Down	Chr14	113961264	113961727	0.000630957
Tmem266	1.82513	Down	Chr8	60013163	60013364	0.0295121
Slc24a3	1.82387	Down	Chr3	139834080	139834230	0.00588844
Cacna1a	1.8226	Down	Chr19	25671492	25671792	0.011749
Klrg2	1.8226	Down	Chr4	66370921	66371617	0.030903
Pomk	1.82008	Down	Chr16	70856272	70856523	0.0316228
Cox10	1.81756	Down	Chr10	50439926	50440175	0.00512861
Slc22a8	1.81756	Down	Chr1	224817703	224817853	0.00489779
Tex40	1.81504	Down	Chr1	222179546	222182095	0.0042658
Cdh9	1.81127	Down	Chr2	67077563	67077811	0.0446684
Ppfibp2	1.80751	Down	Chr1	171889230	171915808	0.000457088
Zcchc16	1.8025	Down	ChrX	116401359	116401758	0.01
Dtx1	1.80125	Down	Chr12	41384740	41385089	0.000851138
Apobec2	1.79751	Down	Chr9	14529466	14538580	0.0040738
Meis2	1.79626	Down	Chr3	107760284	107761776	0.0245471
Mcart1	1.79005	Down	Chr5	60946429	60954143	0.0125893
Plekhm1	1.78881	Down	Chr10	91452839	91452989	0.0131826
Gtf2ird2	1.78386	Down	Chr12	25509108	25509407	0.0165959
Msx2	1.78386	Down	Chr17	11687995	11688539	0.00154882
Zfp341	1.78386	Down	Chr3	150168869	150171341	0.0109648
Prpf3	1.78262	Down	Chr2	197967037	197969102	0.0104713
Cacna2d1	1.78015	Down	Chr4	15707073	15707324	0.00107152
Cdadc1	1.78015	Down	Chr15	39865143	39865394	0.00204174
Stard10	1.78015	Down	Chr1	166457669	166458066	0.00218776
Mocs1	1.77645	Down	Chr9	13494096	13494294	0.0131826
Hlcs	1.77522	Down	Chr11	34358120	34358271	0.011749
Lig4	1.77522	Down	Chr16	85338248	85338399	0.00588844
Nog	1.77522	Down	Chr10	76811857	76812104	0.0177828
Brix1	1.76541	Down	Chr2	60461275	60461425	0.0323594
Irx1	1.76541	Down	Chr1	33914568	33915068	0.000186209
Ccna2	1.76296	Down	Chr2	123275317	123275712	0.017378
Atp5s	1.76174	Down	Chr6	92072629	92075183	0.000676083
Colca2	1.76174	Down	Chr8	55675049	55676679	0.0467735
Lrrcc1	1.76174	Down	Chr2	88385093	88389997	0.00018197
Cldn1	1.75321	Down	Chr11	77827844	77828093	0.018197
Ocln	1.752	Down	Chr2	30529560	30534397	6.91831e-05
Tfpi	1.74715	Down	Chr3	71861125	71862273	1.47911e-10
Galnt3	1.74594	Down	Chr3	52198745	52199143	0.0263027
Acsl4	1.74352	Down	ChrX	113596346	113596496	0.00912011
Stpg1	1.7411	Down	Chr5	153868404	153877448	0.047863
Fgfr1op2	1.73748	Down	Chr4	180907958	180908157	0.000354813
Nsun7	1.73748	Down	Chr14	43527217	43527516	0.0165959
Dlgap1	1.73508	Down	Chr9	119159557	119159757	0.0234423
Foxb1	1.73388	Down	Chr8	75993193	75993685	0.00467735
Il18bp	1.73388	Down	Chr1	167094980	167095180	0.0204174
Alg8	1.73267	Down	Chr1	162358391	162360885	0.0229087
Hook1	1.72907	Down	Chr5	114979184	114981275	0.0154882
Ptn	1.72907	Down	Chr4	64239205	64239355	0.00309029
Chst9	1.72668	Down	Chr18	6834152	6834351	0.0436516
Snx22	1.72548	Down	Chr8	71725503	71725948	0.000331131
Lsamp	1.72429	Down	Chr11	58803206	58803357	0.00562341
Slc2a5	1.72071	Down	Chr5	167173513	167173760	0.0281838
Nfu1	1.71951	Down	Chr4	118834615	118834810	0.0074131
Cacna1d	1.71832	Down	Chr16	6111092	6111642	0.000512861
Senp6	1.71713	Down	Chr8	87567888	87568038	0.0218776
Mllt1	1.71594	Down	Chr9	10155056	10155255	0.017378
Tia1	1.71475	Down	Chr4	118235711	118235961	8.12831e-05
Dcxr	1.71	Down	Chr10	109906266	109906563	0.047863
Rem1	1.70882	Down	Chr3	148108646	148109713	0.040738
Atg14	1.70764	Down	Chr15	24343911	24344653	1.94984e-05
Fcho1	1.70764	Down	Chr16	20145960	20149389	0.0281838
Lsm12	1.70764	Down	Chr10	90105710	90105860	0.00398107
Slc1a5	1.70527	Down	Chr1	78722223	78722499	0.0114815
Aox1	1.70291	Down	Chr9	65006630	65007820	0.000724436
Senp6	1.70173	Down	Chr8	87567638	87567789	0.0436516
Fam110c	1.70055	Down	Chr6	49969361	49972705	0.0380189
Aplp2	1.69819	Down	Chr8	32298625	32298875	0.000141254
Aff3	1.69466	Down	Chr9	44839176	44839426	0.00239883
Glod4	1.69349	Down	Chr10	64379970	64380118	0.000707946
Ppp2r2b	1.68997	Down	Chr18	37245822	37246089	0.0169824
Armcx4	1.6888	Down	ChrX	105504646	105504946	0.00831764
Tmem64	1.6888	Down	Chr5	28870149	28870500	0.0213796
Nudt14	1.68763	Down	Chr6	137738247	137738445	0.0316228
Trio	1.68763	Down	Chr2	80487343	80489173	0.00102329
Lca5	1.68646	Down	Chr8	90962119	90963901	0.0165959
Rprd2	1.68529	Down	Chr2	197882815	197883065	0.0457088
Slc1a2	1.68413	Down	Chr3	92661708	92662056	0.0354813
Cul4b	1.68296	Down	ChrX	124833178	124833377	0.00389045
Ndufb5	1.68179	Down	Chr2	119153463	119153608	0.0416869
Txnrd2	1.68179	Down	Chr11	86668091	86669179	0.0190546
Apobec2	1.67946	Down	Chr9	14542530	14542681	0.0363078
Gper1	1.67946	Down	Chr12	17310968	17313669	0.0138038
Hoxb9	1.6783	Down	Chr10	84124716	84124963	0.0416869
Zfhx3	1.6783	Down	Chr19	42754931	42755132	0.00870964
Purg	1.67714	Down	Chr16	62453107	62453258	0.0467735
Pla2g15	1.67597	Down	Chr19	38146408	38146559	0.0457088
Lgr6	1.67365	Down	Chr13	51812003	51812253	0.0269153
Slc9a5	1.67133	Down	Chr19	37320329	37323654	0.00151356
Hscb	1.67018	Down	Chr12	51881693	51882855	0.00131826
Nek1	1.67018	Down	Chr16	32321857	32328170	1.94984e-05
Fhl4	1.66902	Down	Chr7	26140389	26141080	0.0416869
Cyp4f1	1.66671	Down	Chr7	15179571	15179822	0.0398107
Layn	1.66671	Down	Chr8	55449944	55450244	0.00660693
Trerf1	1.66671	Down	Chr9	15655819	15661397	0.00630957
Cpz	1.66555	Down	Chr14	80425756	80426104	0.0190546
Glt8d2	1.66555	Down	Chr7	27188824	27192989	0.01
Tpd52	1.6644	Down	Chr2	95040627	95041177	0.00123027
Tmem108	1.66094	Down	Chr8	111968666	111968964	0.00549541
Zeb2	1.66094	Down	Chr3	29861075	29861225	0.025704
Zfp532	1.66094	Down	Chr18	61257971	61258821	5.24807e-05
Hnrnpa3	1.65749	Down	Chr3	62489464	62489664	0.000489779
Gng13	1.65634	Down	Chr10	15090484	15090747	0.0331131
Gpr150	1.6529	Down	Chr2	2813010	2813260	0.0457088
Grin2c	1.65061	Down	Chr10	103798389	103798838	0.00144544
Igsf21	1.65061	Down	Chr5	158510879	158511027	0.0229087
Tub	1.65061	Down	Chr1	173629400	173629550	0.0331131
Rspo3	1.64832	Down	Chr1	30713362	30766597	0.00154882
Atp2b4	1.64718	Down	Chr13	50153508	50153758	0.0190546
Cdh8	1.64604	Down	Chr19	6419558	6422984	1.47911e-05
Lppos	1.64604	Down	Chr11	79827921	79828729	0.0047863
Ltbp3	1.64604	Down	Chr1	221115896	221116096	0.0281838
Rasal2	1.64604	Down	Chr13	74812382	74814286	0.00380189
Pacrg	1.64262	Down	Chr1	50491025	50491323	0.040738
Acot2	1.64148	Down	Chr6	107467170	107467320	0.00645654
Haus8	1.64035	Down	Chr16	19664226	19669075	0.0354813
Clpp	1.63921	Down	Chr9	10054568	10055968	1.07152e-06
Atp8b2	1.63807	Down	Chr2	189387536	189388032	9.77237e-05
Eya3	1.6358	Down	Chr5	150914694	150914894	0.0346737
Prdm8	1.6358	Down	Chr14	13054568	13054918	0.0223872
Prr36	1.63467	Down	Chr12	2585675	2586026	0.018197
Myh7b	1.63241	Down	Chr3	151148697	151149211	0.00831764
Ptrhd1	1.63127	Down	Chr6	28666456	28666602	0.0489779
Myef2	1.62902	Down	Chr3	117381445	117389383	0.000263027
Adprhl1	1.6245	Down	Chr16	81647436	81647685	0.0489779
Dram2	1.6245	Down	Chr2	209188362	209188510	0.0269153
Susd6	1.6245	Down	Chr6	104525973	104528824	0.000467735
Wwp1	1.6245	Down	Chr5	33609236	33617695	8.70964e-07
Calml4	1.62338	Down	Chr8	67760479	67765259	0.0229087
Pon2	1.61888	Down	Chr4	30344753	30344900	0.00162181
Rdm1	1.61888	Down	Chr10	89546189	89550398	0.0263027
Stx1a	1.61888	Down	Chr12	24692088	24696997	0.0218776
Comtd1	1.61776	Down	Chr15	2634197	2634493	0.00724436
Gcc2	1.61664	Down	Chr20	27848322	27850124	0.0158489
Spen	1.61664	Down	Chr5	160015722	160017487	0.00562341
Hes7	1.6144	Down	Chr10	55708772	55709482	0.0416869
Zfp184	1.61217	Down	Chr17	44629580	44630329	0.0018197
Cep95	1.61105	Down	Chr10	95008702	95011928	0.00549541
Dek	1.61105	Down	Chr17	17965970	17971175	0.0190546
Ahsp	1.60882	Down	Chr1	199720731	199720871	0.0190546
Lnp	1.60882	Down	Chr3	61439073	61442600	0.00436516
Fam196a	1.60659	Down	Chr1	207116797	207117248	0.0107152
Tmem44	1.60659	Down	Chr11	73773508	73774149	0.000141254
Micu1	1.60547	Down	Chr20	29433071	29433518	0.0501187
Mtus2	1.60436	Down	Chr12	8113199	8113349	0.0436516
Ubxn2a	1.60436	Down	Chr6	28972999	28980241	1e-05
Poll	1.60325	Down	Chr1	265296822	265297971	2.04174e-05
Smoc2	1.60325	Down	Chr1	56373318	56373860	4.36516e-05
Mlnr	1.60214	Down	Chr19	55181659	55182105	0.00630957
Mafa	1.60103	Down	Chr7	116781265	116781615	0.047863
Cd4	1.59992	Down	Chr4	157381960	157382110	0.0295121
Vstm1	1.59881	Down	Chr1	64275223	64275421	0.00275423
Lars	1.5966	Down	Chr18	36524062	36524211	0.00446684
Grm1	1.59438	Down	Chr1	4754835	4755584	0.00223872
Plekhh3	1.59438	Down	Chr10	89076565	89077867	0.0177828
Rnf220	1.59438	Down	Chr5	136146927	136147078	0.017378
Tiparp	1.59438	Down	Chr2	157335654	157341385	0.000104713
Zfand2a	1.59438	Down	Chr12	17261231	17261431	0.00338844
Ctdp1	1.59218	Down	Chr18	76984448	76984946	0.0363078
Hps3	1.59218	Down	Chr2	104789571	104789920	0.0331131
Fam184a	1.58997	Down	Chr20	34937169	34940284	0.0331131
Ankrd10	1.58887	Down	Chr16	83228846	83228997	0.0177828
Psmd11	1.58887	Down	Chr10	67857262	67857413	0.00229087
Ndufa12	1.58777	Down	Chr7	35125565	35163082	0.0060256
Nkd1	1.58447	Down	Chr19	19434819	19435119	0.00331131
Scn7a	1.58447	Down	Chr3	52775828	52776078	0.00537032
Wee1	1.58447	Down	Chr1	174783234	174785207	0.000812831
Polr3c	1.58227	Down	Chr2	198836578	198838489	0.0017378
Lpcat1	1.58008	Down	Chr1	32379529	32379727	0.0457088
Ntsr1	1.58008	Down	Chr3	176044453	176044852	0.0218776
Pir	1.58008	Down	ChrX	31852370	31852615	0.00363078
Ccdc88c	1.5768	Down	Chr6	124907659	124907810	0.0316228
Syde2	1.57571	Down	Chr2	251894774	251895424	0.000660693
Tnnt1	1.57571	Down	Chr1	72895251	72896325	0.0501187
Parp11	1.57352	Down	Chr4	160055344	160057634	0.0107152
Tmem104	1.57352	Down	Chr10	103795350	103795651	0.0194984
Dnajc24	1.57243	Down	Chr3	96029958	96040821	0.0275423
Myo10	1.57243	Down	Chr2	78071942	78072443	0.00295121
Nr4a1	1.57243	Down	Chr7	142912367	142916137	2.95121e-09
Msh3	1.57135	Down	Chr2	21790146	21799116	0.000269153
Rbak	1.57135	Down	Chr12	13441181	13442129	0.000660693
Ints12	1.56917	Down	Chr2	238267452	238269223	0.0194984
Pigk	1.56917	Down	Chr2	257997535	257997685	0.00588844
Rac3	1.56917	Down	Chr10	109906250	109906547	0.0346737
Zic1	1.56699	Down	Chr8	98734058	98734206	0.0467735
Timm10b	1.56374	Down	Chr1	170473871	170474063	0.00933254
Dleu7	1.56266	Down	Chr15	45360554	45360802	0.00933254
Hnrnpu	1.56157	Down	Chr13	96222341	96222491	0.00158489
Rmnd5a	1.56157	Down	Chr4	99253483	99255149	0.01
Satb1	1.56049	Down	Chr9	2277499	2277749	0.0389045
Brd3	1.55941	Down	Chr3	5995552	5995802	0.0436516
Mink1	1.55941	Down	Chr10	57237981	57238481	0.000229087
Clybl	1.55833	Down	Chr15	108837977	108838125	0.0363078
Cacna1a	1.55725	Down	Chr19	25747704	25748154	0.00151356
Fbxo22	1.55617	Down	Chr8	59782609	59785365	7.58578e-05
Heatr3	1.55617	Down	Chr19	19859566	19862858	0.00616595
Cdc5l	1.55509	Down	Chr9	17956191	17960860	9.33254e-06
Nagk	1.55509	Down	Chr4	115481134	115481285	0.0398107
Sorbs2	1.55509	Down	Chr16	49627792	49648545	0.000676083
Tcaim	1.55509	Down	Chr8	131876599	131876847	0.00512861
Zswim6	1.55509	Down	Chr2	38979479	38979778	0.0467735
Smc6	1.55401	Down	Chr6	36963788	36964111	0.00776247
Ccdc186	1.55294	Down	Chr1	277603700	277604100	0.0489779
Ddx11	1.55186	Down	Chr9	114132474	114133019	0.0199526
Mgat4b	1.55186	Down	Chr10	35736090	35736239	0.0346737
Rufy4	1.55186	Down	Chr9	81409254	81410187	0.00707946
Phf14	1.54864	Down	Chr4	38371220	38371918	0.00309029
Lrch1	1.54542	Down	Chr15	56784548	56784997	0.001
Zfp385d	1.54435	Down	Chr15	6200923	6233051	0.000316228
Arhgap18	1.54221	Down	Chr1	19227264	19258992	0.00354813
Peli3	1.54007	Down	Chr1	220192890	220193187	0.0371535
Dusp22	1.53901	Down	Chr17	34986688	34986838	0.0114815
N4bp2l1	1.53901	Down	Chr12	548151	551701	0.0489779
Cct8	1.53688	Down	Chr11	27130467	27130765	2.95121e-05
Disp3	1.53688	Down	Chr5	165052118	165052467	0.00645654
Chd6	1.53368	Down	Chr3	156937845	156938246	0.0446684
Fry	1.53368	Down	Chr12	5634185	5634385	0.0186209
Mtpap	1.53368	Down	Chr17	56047147	56047788	0.000229087
Trabd	1.53368	Down	Chr7	130068825	130069174	0.0104713
Dnase1l1	1.53156	Down	ChrX	156437819	156438017	0.0467735
Prkca	1.53156	Down	Chr10	96192177	96192327	0.0263027
Ddx21	1.5305	Down	Chr20	32230100	32232582	0.0501187
Dsp	1.5305	Down	Chr17	27292513	27293811	0.011749
Slco1c1	1.52944	Down	Chr4	175776451	175776601	0.0251189
Zdhhc15	1.52944	Down	ChrX	75437380	75437630	0.0251189
Lrrc55	1.52732	Down	Chr3	72595357	72595757	0.0457088
Naip6	1.52732	Down	Chr2	30390889	30391240	0.0251189
Wdr46	1.52732	Down	Chr20	5455110	5455534	0.00269154
Skiv2l	1.52626	Down	Chr20	4519506	4519656	0.0346737
Chd1	1.5252	Down	Chr1	57751533	57756063	0.000616595
Chd5	1.52414	Down	Chr5	169556661	169557345	0.0107152
Tmem5	1.52414	Down	Chr7	64340908	64341104	0.0162181
Zfp580	1.52414	Down	Chr1	72338515	72338755	0.0223872
Pcbp2	1.52309	Down	Chr7	144102179	144102329	0.0134896
Asic3	1.52098	Down	Chr4	7287917	7288314	0.00676083
Camk4	1.51887	Down	Chr18	25975363	25975912	0.00131826
Bicdl1	1.51782	Down	Chr12	46615893	46678039	0.0154882
Sema5a	1.51782	Down	Chr2	85808769	85808920	0.0380189
Sh2b1	1.51677	Down	Chr1	197884917	197885067	0.0346737
Cped1	1.51467	Down	Chr4	49311243	49332585	0.000234423
Srsf1	1.51257	Down	Chr10	75338467	75338766	0.00954993
Btbd11	1.51152	Down	Chr7	24041243	24041640	0.018197
Atf6	1.50733	Down	Chr13	89058054	89058255	0.00269154
Med13	1.50733	Down	Chr10	73702625	73703025	0.0223872
Araf	1.50629	Down	ChrX	1379305	1379455	0.0398107
Fryl	1.50629	Down	Chr14	37756213	37756912	4.67735e-05
Pcgf2	1.50629	Down	Chr10	85632968	85634820	0.0042658
Txnl1	1.50629	Down	Chr18	59056751	59056950	0.0107152
Usp10	1.50629	Down	Chr19	52608373	52608770	0.0199526
Axin2	1.50525	Down	Chr10	97238130	97238626	0.0316228
Rad52	1.5042	Down	Chr4	152449311	152450294	0.0218776
Kpna1	1.50316	Down	Chr11	67652622	67653172	0.00295121
Myl9	1.50316	Down	Chr3	152863623	152863865	0.00501187
Asph	1.50212	Down	Chr5	22746115	22746415	0.0223872
Card9	1.50212	Down	Chr3	3798394	3799195	0.047863
Epha5	1.50108	Down	Chr14	25945374	25954071	0.0288403
Frmpd3	1.50108	Down	ChrX	111777343	111777994	0.001
Ap3b1	1.50004	Down	Chr2	24225174	24225524	0.0389045
Ccdc141	1.50004	Down	Chr3	63865588	63866634	0.000467735
Ccr7	1.50004	Down	Chr10	87057383	87057821	1.25893e-05
Mcemp1	1.49796	Down	Chr12	2215139	2216956	0.00676083
Rbm26	1.49796	Down	Chr15	89268326	89270267	0.0114815
Slc38a9	1.49796	Down	Chr2	44592293	44592693	0.0147911
Tmie	1.49796	Down	Chr8	119142165	119147027	1.8197e-06
Socs5	1.49692	Down	Chr6	10704262	10705011	4.2658e-05
Ccdc174	1.49589	Down	Chr4	123783327	123787186	0.0416869
Ipmk	1.49589	Down	Chr20	18458599	18458998	0.00977237
Lca5	1.49589	Down	Chr8	90927643	90927944	0.0501187
Col15a1	146.018	Up	Chr5	62919077	62932072	5.01187e-12
Ankrd12	53.8174	Up	Chr9	113616413	113627199	0.000151356
Rufy2	44.9422	Up	Chr20	27238227	27239721	0.00138038
Rbm47	27.0958	Up	Chr14	43829976	43830426	0.049
M6pr	24.0839	Up	Chr4	155091152	155092309	0.000891251
Mfsd14a	20.1122	Up	Chr1	69818570	69818720	0.0158489
Tbc1d12	19.0273	Up	Chr1	257575383	257577441	6.30957e-05
Fkbp15	15.2422	Up	Chr5	78159076	78160813	4.67735e-05
Clcn2	13.737	Up	Chr11	82870288	82870722	0.00562341
Cttn	13.3614	Up	Chr1	217604035	217606644	0.000354813
Pfkfb4	11.9588	Up	Chr8	117756057	117769915	1.1749e-08
Col15a1	11.5514	Up	Chr5	62947408	62949291	0.000446684
Rtkn	10.4107	Up	Chr4	114847835	114848363	1.77828e-05
P2ry10	9.25351	Up	ChrX	78208264	78208415	6.45654e-05
Clcn2	8.81524	Up	Chr11	82870924	82875866	0.000831764
Gpr35	7.56846	Up	Chr9	100138426	100138677	0
Gpr35	7.1602	Up	Chr9	100138177	100138328	0
Mtdh	6.63456	Up	Chr7	72817318	72823449	0.00501187
Kif26b	6.1475	Up	Chr13	96792982	96793132	0.00112202
Rab44	5.89708	Up	Chr20	6399940	6400139	1.25893e-05
Cav3	5.6962	Up	Chr4	144398096	144398242	0.000524807
Sstr3	5.09824	Up	Chr7	119761078	119761227	0.00309029
Sytl2	5.06303	Up	Chr1	156335095	156335395	0.000186209
Epb41l1	4.85678	Up	Chr3	152583471	152584155	0.00512861
Epb41l1	4.56305	Up	Chr3	152571269	152581255	0.000275423
Celsr3	4.53154	Up	Chr8	117622238	117622538	4.89779e-05
Faim2	4.46915	Up	Chr7	141183124	141185533	0.00047863
Myo18b	4.46915	Up	Chr12	49977354	49979645	0.000977237
Aven	4.28709	Up	Chr3	103998020	104042232	0.0138038
Hivep3	4.28709	Up	Chr5	139038254	139038504	4.2658e-06
Fam160a1	4.16986	Up	Chr2	184942456	184942704	0.00316228
Zbtb37	4.11246	Up	Chr13	78837384	78837583	0.000141254
Tmem151a	3.97237	Up	Chr1	220462910	220463610	5.12861e-08
Mettl4	3.78423	Up	Chr9	119873528	119873728	0.00457088
Mob3b	3.78423	Up	Chr5	50439738	50469792	5.62341e-06
Ahnak2	3.75809	Up	Chr6	137357931	137358131	0.00346737
Ltb4r	3.73213	Up	Chr15	34452952	34453302	2.95121e-09
Ptgdr	3.73213	Up	Chr15	18095442	18095589	0.00691831
Fbxw4	3.68075	Up	Chr1	265420107	265420256	0.0229087
Faim2	3.605	Up	Chr7	141172936	141179612	0.00245471
Myh9l1	3.605	Up	Chr7	118747963	118748273	0.0446684
Pdzd2	3.605	Up	Chr2	62425408	62427121	0.00363078
Nod2	3.5801	Up	Chr19	19365085	19365385	1.14815e-05
Slco4a1	3.55537	Up	Chr3	175847214	175847364	0.0323594
Pirt	3.50642	Up	Chr10	53483196	53483347	8.31764e-05
Zfp420	3.50642	Up	Chr1	88533606	88542144	0.0199526
Cebpb	3.45815	Up	Chr3	164425340	164425489	0.00323594
Gpr63	3.43426	Up	Chr5	39370091	39370242	0.0141254
Spin4	3.43426	Up	ChrX	64220878	64221027	0
Myh6	3.41054	Up	Chr15	33607906	33610786	1.51356e-05
Nod2	3.41054	Up	Chr19	19376356	19376707	1.77828e-06
Scube2	3.36359	Up	Chr1	174428352	174428501	0.0229087
Stard9	3.34035	Up	Chr3	112490341	112490492	0.0112202
Fbxw4	3.31728	Up	Chr1	265420354	265420503	0.00724436
Pcdhgb4	3.29436	Up	Chr18	30870890	30871138	0.0112202
Cyp4f18	3.24901	Up	Chr16	19528637	19528836	0.000125893
Entpd1	3.22657	Up	Chr1	259740037	259796221	0.0123027
Sirpb2l1	3.22657	Up	Chr2	87600483	87619115	0.00020893
Sorbs1	3.22657	Up	Chr1	259410726	259410977	0.000588844
Wnk3	3.22657	Up	ChrX	20351555	20351705	0.00933254
Ston2	3.20428	Up	Chr6	115513257	115515522	0.011749
Agap1	3.18215	Up	Chr9	96722539	96722690	0.01
Myh6	3.18215	Up	Chr15	33611529	33612811	5.62341e-08
Grin3b	3.16017	Up	Chr7	12769888	12770244	0.000371535
Zbtb20	3.16017	Up	Chr11	62027345	62027495	0.00158489
Bend4	3.13834	Up	Chr14	42412108	42412358	0.000724436
Zfp618	3.13834	Up	Chr5	78965618	78965918	0.00389045
N4bp2	3.11666	Up	Chr14	44072667	44072818	0.0141254
Kdm5a	3.05252	Up	Chr4	152892537	152892688	0.0047863
Parp14	3.05252	Up	Chr11	68135811	68136062	0.00104713
RT1-M6-2	2.94854	Up	Chr20	2076730	2077065	0.0144544
Bsn	2.92817	Up	Chr8	116902654	116914571	0.0457088
C2cd4a	2.90795	Up	Chr8	73673254	73673952	0.0047863
Ntng2	2.90795	Up	Chr3	7800239	7800388	0.0165959
Eid3	2.8481	Up	Chr7	26976889	26977430	8.31764e-09
Zfhx3	2.8481	Up	Chr19	42919099	42919250	0.0114815
Dll1	2.82843	Up	Chr1	57326484	57326732	5.12861e-05
Zbtb20	2.82843	Up	Chr11	62018354	62018504	0.00234423
Itpripl2	2.78949	Up	Chr1	188142548	188142698	0.0194984
P2rx7	2.78949	Up	Chr12	39355302	39355700	0.000389045
Zfp780b-ps1	2.78949	Up	Chr1	84881304	84881605	0.0040738
Zmynd15	2.77022	Up	Chr10	57064780	57065035	0.000234423
Myh7	2.75108	Up	Chr15	33637747	33639754	3.0903e-07
Dgka	2.69447	Up	Chr7	3169916	3170166	0.000346737
Plce1	2.69447	Up	Chr1	257192523	257192674	0.00630957
Rab44	2.67586	Up	Chr20	6400237	6400435	0.000537032
Dusp4	2.63902	Up	Chr16	61090675	61090924	0.0018197
Mob3c	2.63902	Up	Chr5	134683972	134684171	0.00851138
Slfn1	2.63902	Up	Chr10	70394590	70399158	2.04174e-09
Cd27	2.62079	Up	Chr4	157745130	157745330	0.01
Ntn1	2.62079	Up	Chr10	54967356	54967701	0.00234423
Myh7	2.60268	Up	Chr15	33637257	33637407	0.0060256
Sorbs1	2.58471	Up	Chr1	259411075	259411276	0.00645654
Tnni3	2.58471	Up	Chr1	72884798	72885454	0.000912011
Mex3a	2.56685	Up	Chr2	187897522	187897771	0.00891251
Nmur2	2.56685	Up	Chr10	41408221	41408419	0.0446684
Zdbf2	2.56685	Up	Chr9	70081656	70081807	0.0125893
Ahnak2	2.54912	Up	Chr6	137358630	137359180	2.81838e-05
Lmtk2	2.54912	Up	Chr12	12424478	12424778	0.00346737
Ccl24	2.49666	Up	Chr12	24152033	24152379	0.00446684
Pcdhb2	2.49666	Up	Chr18	30376745	30377745	2.39883e-07
Pik3cg	2.49666	Up	Chr6	51497930	51498231	0.00109648
Shroom3	2.49666	Up	Chr14	16647572	16647822	1.8197e-05
Col28a1	2.47942	Up	Chr4	34048223	34048473	0.000912011
Rnf213	2.47942	Up	Chr10	108581279	108581430	0.00831764
Sacs	2.47942	Up	Chr15	41458852	41459053	0.0213796
Zfhx3	2.47942	Up	Chr19	42766280	42767080	1.51356e-06
Xpo4	2.46229	Up	Chr15	37840877	37841328	3.31131e-06
Pcdha4	2.44528	Up	Chr18	29973896	29974147	0.0234423
Rab32	2.44528	Up	Chr1	4652973	4653122	0.0025704
Slc15a3	2.44528	Up	Chr1	226897579	226897927	0.000954993
Stard9	2.44528	Up	Chr3	112488842	112489043	0.00891251
Zfp334	2.44528	Up	Chr3	162076827	162077027	0.000676083
Selp	2.42839	Up	Chr13	82461910	82464530	7.94328e-12
Lrrc15	2.41162	Up	Chr11	74050340	74050887	2.5704e-10
Stard9	2.41162	Up	Chr3	112488342	112488743	0.000234423
Hdx	2.37841	Up	ChrX	82945558	82945907	3.80189e-05
Pde5a	2.37841	Up	Chr2	226925899	226926148	0.00436516
Tnnc1	2.37841	Up	Chr16	7293915	7294450	2.18776e-05
Zfx	2.37841	Up	ChrX	63166073	63178098	0.000190546
Tmem241	2.36199	Up	Chr18	3445446	3445795	0.000562341
Has1	2.34567	Up	Chr1	59725492	59732409	3.98107e-11
Stard4	2.34567	Up	Chr18	25993256	25997505	0.0131826
Zfp275	2.34567	Up	ChrX	157462287	157462737	5.12861e-05
Tbc1d10c	2.32947	Up	Chr1	219432092	219432293	0.00489779
Col8a1	2.31338	Up	Chr11	45005316	45005465	0.017378
Bach2	2.2974	Up	Chr5	47788031	47788380	0.00501187
Nfatc1	2.2974	Up	Chr18	77307783	77307932	0.0040738
Ptger1	2.2974	Up	Chr19	24801463	24801612	0.042658
Arhgap22	2.28153	Up	Chr16	9486912	9540073	9.33254e-05
Chst11	2.28153	Up	Chr7	26859539	26859690	0.0213796
Hspa1a	2.28153	Up	Chr20	4878825	4879122	0.000416869
Plxna1	2.28153	Up	Chr4	121257192	121257842	2.13796e-07
Ptger4	2.28153	Up	Chr2	54962961	54963260	0.00758578
Spn	2.28153	Up	Chr1	198574286	198574684	0.00562341
Col6a3	2.26577	Up	Chr9	97962309	97962609	2.29087e-06
Fam83g	2.26577	Up	Chr10	47979267	47983489	0
Loxl4	2.26577	Up	Chr1	261836255	261838852	2.88403e-07
Pofut1	2.25012	Up	Chr3	148740923	148745087	0.00660693
Stard9	2.23457	Up	Chr3	112489941	112490142	0.0154882
Zfhx3	2.23457	Up	Chr19	42918649	42919000	0.00131826
Has1	2.21914	Up	Chr1	59720761	59721360	1.23027e-06
Ptgfr	2.21914	Up	Chr2	257036607	257036857	0.0288403
Zdbf2	2.21914	Up	Chr9	70081257	70081458	0.0331131
Fgf2	2.20381	Up	Chr2	124081264	124081459	0.000204174
Il1rl2	2.18859	Up	Chr9	47093278	47093429	0.0213796
Stk17b	2.18859	Up	Chr9	60429175	60429526	1.07152e-05
Ltb4r	2.17347	Up	Chr15	34452305	34452854	3.46737e-05
Runx1	2.17347	Up	Chr11	32765245	32765545	0.000269153
Scnn1a	2.17347	Up	Chr4	157858123	157858960	0.0467735
Rasef	2.15846	Up	Chr5	90481816	90488686	0.0251189
Shroom4	2.15846	Up	ChrX	16762335	16763234	1.07152e-07
Fyb	2.12874	Up	Chr2	55939993	55948273	0.000199526
Hrh1	2.12874	Up	Chr4	146455477	146455725	0.0194984
Nr3c2	2.12874	Up	Chr19	34751688	34751838	0.0229087
Prickle2	2.12874	Up	Chr4	124358881	124359131	0.00363078
Smarcad1	2.12874	Up	Chr4	95908972	95912511	0.00288403
Tlr1	2.12874	Up	Chr14	45064713	45064914	0.00389045
Slc11a1	2.11404	Up	Chr9	81666251	81666549	6.45654e-05
Tpi1	2.11404	Up	Chr4	157328973	157329123	0.00165959
Zfp316	2.11404	Up	Chr12	13362878	13363178	0.0323594
Adamts15	2.09943	Up	Chr8	31999582	32000130	1.12202e-05
Col6a3	2.09943	Up	Chr9	97970830	97975286	2.29087e-10
Ficd	2.09943	Up	Chr12	48661935	48662085	0.0104713
Neurl3	2.09943	Up	Chr9	42831883	42835670	7.24436e-07
Pclo	2.08493	Up	Chr4	16654791	16668838	0.0138038
Piezo2	2.08493	Up	Chr18	58395097	58398861	0.00933254
Cd101	2.07053	Up	Chr2	203402152	203403541	0.00194984
Egr3	2.07053	Up	Chr15	51759357	51759507	0.0389045
Kmt2d	2.07053	Up	Chr7	140522199	140522502	0.00977237
Osm	2.07053	Up	Chr14	84468488	84468785	4.36516e-05
Pcdhb20	2.07053	Up	Chr18	30583812	30583962	0.0489779
Qser1	2.07053	Up	Chr3	94739660	94739811	0.0169824
A3galt2	2.05623	Up	Chr5	146944559	146944707	0.000954993
Aff2	2.05623	Up	ChrX	153574196	153582990	0.0446684
Macf1	2.05623	Up	Chr5	141161687	141166272	1.90546e-08
Mefv	2.05623	Up	Chr10	12050816	12052211	0.00186209
Oprm1	2.05623	Up	Chr1	43508442	43508592	0.0162181
Slamf1	2.05623	Up	Chr13	90216115	90218227	2.39883e-10
Ttc28	2.05623	Up	Chr12	51452817	51453068	0.0263027
Uimc1	2.05623	Up	Chr17	10090586	10090735	0.0223872
Chd9	2.04202	Up	Chr19	17493363	17494663	4.67735e-08
Itsn1	2.04202	Up	Chr11	32067437	32069249	0.0194984
Tlr5	2.04202	Up	Chr13	101382845	101383043	0.0040738
Exosc6	2.02792	Up	Chr19	43191921	43192171	0.0186209
Fgf22	2.02792	Up	Chr7	12829833	12831675	0.00025704
Zfp469	2.02792	Up	Chr19	55073667	55076659	0
Zfp507	2.02792	Up	Chr1	92112341	92119833	0.00363078
Det1	2.01391	Up	Chr1	140528964	140532756	1.02329e-05
Peg10	2.01391	Up	Chr4	29802533	29803033	0.000104713
Xirp1	2.01391	Up	Chr8	128705024	128705325	0.00102329
Cep68	2	Up	Chr14	104503941	104505475	1.69824e-07
Spen	2	Up	Chr5	160043084	160070865	2.51189e-06
Dsp	1.99585	Up	Chr17	27292014	27292215	0.0138038
Snx20	1.99308	Up	Chr19	19399755	19404105	1.31826e-05
Hecw2	1.9917	Up	Chr9	60572830	60574215	7.94328e-08
Wipf1	1.9917	Up	Chr3	60158445	60158594	3.80189e-05
Ddhd1	1.98894	Up	Chr15	20031664	20031964	0.0229087
Arid3a	1.98343	Up	Chr7	12596719	12597692	0.025704
Ntan1	1.98343	Up	Chr10	3234929	3235129	0.011749
Insr	1.9752	Up	Chr12	1743683	1793767	0.000107152
Svil	1.9752	Up	Chr17	55283057	55285568	0.000269153
Nin	1.97247	Up	Chr6	92426560	92426961	0.0011749
Mrgprd	1.96837	Up	Chr1	218481938	218487845	0.0141254
C5ar2	1.967	Up	Chr1	78167785	78180117	0.0501187
Wisp1	1.9602	Up	Chr7	107710644	107716611	0.0316228
Zfp192	1.9602	Up	Chr17	45082920	45084542	0.000645654
Cblb	1.95884	Up	Chr11	51057599	51068932	0.0123027
Cdh6	1.95884	Up	Chr2	63166394	63246618	0.000154882
Xirp1	1.94531	Up	Chr8	128705973	128707222	0
Ccr7	1.94396	Up	Chr10	87058257	87061479	0.00245471
Mettl13	1.94396	Up	Chr13	80438556	80438756	0.000851138
Ptprcap	1.93724	Up	Chr1	219405882	219406129	0.0380189
Panx1	1.93589	Up	Chr8	13569539	13572013	0.000144544
Tgfbrap1	1.93321	Up	Chr9	49875260	49880171	1.62181e-06
Pclo	1.93187	Up	Chr4	16651083	16651334	0.0398107
Lcor	1.92519	Up	Chr1	260825159	260825959	3.31131e-09
Tiam1	1.92252	Up	Chr11	30036551	30050837	9.33254e-06
Zkscan5	1.92252	Up	Chr12	11174907	11175355	4.7863e-05
Gcnt6	1.92119	Up	Chr17	21739296	21739793	7.07946e-06
Cdkn2b	1.91986	Up	Chr5	107852866	107853316	0.000933254
Fbxl15	1.91986	Up	Chr1	266076030	266076712	0.00331131
Myh9	1.91986	Up	Chr7	118996119	118999525	1.25893e-09
Rnf213	1.91587	Up	Chr10	108568044	108568295	0.00309029
Pclo	1.91454	Up	Chr4	16652085	16652286	0.0263027
Dclre1a	1.90792	Up	Chr1	277350059	277352645	1.99526e-11
Cyp1b1	1.90528	Up	Chr6	2311026	2311726	8.12831e-08
Ccdc88b	1.90132	Up	Chr1	222108376	222114373	6.0256e-08
Bsn	1.9	Up	Chr8	116887600	116888249	0.000177828
Pcdh19	1.9	Up	ChrX	104492470	104493018	0.000338844
Cep85	1.89737	Up	Chr5	152378327	152381308	5.7544e-05
Aldh1a3	1.88688	Up	Chr1	127311901	127315828	0.0323594
Fat3	1.88426	Up	Chr8	14878045	14878196	0.0501187
Fas	1.87774	Up	Chr1	252622973	252623514	8.31764e-05
Dst	1.87254	Up	Chr9	38017337	38017588	0.00120226
Arfgef3	1.87125	Up	Chr1	13839456	13846417	1.99526e-11
Prkd3	1.87125	Up	Chr6	1614065	1614764	8.12831e-07
Btbd11	1.86865	Up	Chr7	24313673	24313972	0.0151356
Iqsec3	1.86865	Up	Chr4	154043344	154043944	0.00239883
Phyhd1	1.86865	Up	Chr3	8828101	8829907	0.0229087
Tmem178b	1.86865	Up	Chr4	68051276	68051675	0.0020893
Clasp1	1.86736	Up	Chr13	34399908	34400259	0.00954993
Mdfic	1.86736	Up	Chr4	42202845	42203095	0.00245471
Scn11a	1.86607	Up	Chr8	128450891	128451439	2.23872e-06
Aff1	1.86219	Up	Chr14	7291704	7292103	0.000489779
Cytip	1.86219	Up	Chr3	44151229	44151671	0.000446684
Parp14	1.86219	Up	Chr11	68134412	68135613	0.00194984
Ece2	1.8609	Up	Chr11	83979023	83985281	0.00363078
Znrf1	1.85832	Up	Chr19	43750749	43818034	0.00204174
Mdn1	1.85318	Up	Chr5	47988640	47989139	9.54993e-05
Zdhhc18	1.85189	Up	Chr5	151829942	151830092	0.0218776
Map6	1.84676	Up	Chr1	164227370	164227620	0.00138038
Agap1	1.84421	Up	Chr9	96722788	96722989	0.0218776
Rtn4rl2	1.84421	Up	Chr3	72283144	72283394	0.00724436
Dact1	1.84293	Up	Chr6	93748012	93749857	1.44544e-10
Shprh	1.84165	Up	Chr1	5254435	5256083	0.000436516
Lilrc2	1.8391	Up	Chr1	63679567	63683577	5.01187e-14
Tlr13	1.83783	Up	ChrX	77233252	77233402	0.00288403
Dhx38	1.83655	Up	Chr19	42110389	42110747	0.00831764
Pnck	1.83528	Up	ChrX	157154312	157154460	0.0288403
Arse	1.83401	Up	Chr2	122883730	122884175	0.00891251
Ston2	1.83401	Up	Chr6	115399380	115399531	0.0338844
Ptp4a1	1.8302	Up	Chr9	37227910	37228060	0.000537032
Dcun1d3	1.82893	Up	Chr1	189628187	189665755	5.62341e-08
Cd80	1.8264	Up	Chr11	64816799	64817050	0.00467735
Myh6	1.82134	Up	Chr15	33613163	33614983	4.57088e-06
Gcnt1	1.82008	Up	Chr1	236580816	236581065	0.0165959
Sap30	1.82008	Up	Chr16	36116090	36116289	0.00245471
Hivep1	1.81504	Up	Chr17	22308562	22309660	9.77237e-07
Egr3	1.81378	Up	Chr15	51758516	51759259	1.90546e-06
Fbxl5	1.81378	Up	Chr14	71876776	71877325	3.98107e-12
Pram1	1.81127	Up	Chr7	18510375	18510722	0.000645654
Fga	1.81001	Up	Chr2	182011916	182012213	2.81838e-06
Tlr4	1.80876	Up	Chr5	82599559	82600657	8.31764e-07
Gabpb2	1.805	Up	Chr2	196359118	196361431	5.7544e-06
Zfp469	1.805	Up	Chr19	55073219	55073569	1.31826e-06
Hgh1	1.8025	Up	Chr7	117434909	117435107	0.017378
Zfp59	1.8025	Up	Chr1	84938754	84939155	0.00912011
Arc	1.8	Up	Chr7	115908663	115908913	0.000316228
Arfgef3	1.8	Up	Chr1	13907818	13908318	2.88403e-05
C5ar2	1.8	Up	Chr1	78167487	78167687	0.0288403
Faap100	1.8	Up	Chr10	109546720	109549889	5.01187e-09
Cux1	1.79502	Up	Chr12	23403121	23407498	6.30957e-07
Col27a1	1.79378	Up	Chr5	79064629	79065475	1.65959e-08
Spred3	1.79378	Up	Chr1	88104037	88112075	2.18776e-09
Gjb3	1.78881	Up	Chr5	145390738	145391137	0.0165959
Hps5	1.78881	Up	Chr1	102819375	102826930	3.31131e-05
Chml	1.78757	Up	Chr13	93740807	93742575	1.1749e-09
Rapgef6	1.78757	Up	Chr10	40037383	40039085	0.0102329
Cd163	1.78509	Up	Chr4	156778546	156782169	0.000234423
Prdm1	1.78262	Up	Chr20	49467700	49467949	0.00301995
Ice2	1.77892	Up	Chr8	75649284	75649884	0.000954993
Plagl1	1.77892	Up	Chr1	7255094	7255245	0.040738
Ppp1r9a	1.77892	Up	Chr4	30150513	30165280	0.00245471
Sall1	1.77892	Up	Chr19	23400585	23400983	6.91831e-05
Ap5m1	1.77769	Up	Chr15	25940499	25940899	5.37032e-05
Cd40	1.77769	Up	Chr3	161534152	161534548	0.00954993
Malt1	1.77769	Up	Chr18	61159455	61159705	0.00512861
Setbp1	1.77769	Up	Chr18	75429900	75430251	0.011749
Ttc4	1.77645	Up	Chr5	126265899	126266148	1.1749e-05
Nat8f3	1.77399	Up	Chr4	117489828	117490476	0.00213796
Ptcd1	1.77276	Up	Chr12	11218046	11218296	0.00501187
Adipor2	1.77031	Up	Chr4	151465704	151480058	0.0213796
Hivep2	1.76786	Up	Chr1	8314692	8314843	0.0165959
Fam198b	1.76541	Up	Chr2	178681030	178681280	0.017378
Tcf20	1.76541	Up	Chr7	123714645	123714945	0.00933254
Ercc4	1.76418	Up	Chr10	2010834	2017367	0.00524807
Kcna3	1.76296	Up	Chr2	209767653	209768344	8.31764e-06
Slc37a2	1.76296	Up	Chr8	39709926	39711133	1.38038e-07
Maml1	1.76052	Up	Chr10	35773465	35777037	6.45654e-09
Ston2	1.7593	Up	Chr6	115409422	115409870	0.000323594
Shroom3	1.75808	Up	Chr14	16646874	16647025	0.00562341
Tln2	1.75808	Up	Chr8	73019914	73033307	0.0234423
Sptbn5	1.75686	Up	Chr3	111841203	111841628	0.00162181
Zfyve26	1.75686	Up	Chr6	102411383	102414986	0.0151356
Kcnd3	1.75564	Up	Chr2	207931151	207931401	0.0141254
Map3k14	1.75564	Up	Chr10	91303526	91304769	5.7544e-07
Lrrc15	1.75443	Up	Chr11	74050986	74051632	1.62181e-07
Tmem168	1.74957	Up	Chr4	40036322	40036621	0.00501187
Setdb2	1.74594	Up	Chr15	39725646	39728178	0.000109648
Slc41a2	1.74594	Up	Chr7	26522462	26522811	0.000501187
Sphk1	1.7411	Up	Chr10	105500618	105501758	5.12861e-09
Creb5	1.73869	Up	Chr4	83832883	83833974	0.0316228
Prr14l	1.73748	Up	Chr14	83236602	83250290	2.04174e-10
Tnnt2	1.73508	Up	Chr13	52663071	52680894	8.51138e-07
Wiz	1.73267	Up	Chr7	14378362	14379558	0.00323594
Kin	1.73147	Up	Chr17	72206314	72209150	0.0436516
Erc1	1.73027	Up	Chr4	152355366	152355816	0.00380189
Mon1a	1.72788	Up	Chr8	116676479	116679416	0.000524807
Herc1	1.72668	Up	Chr8	72029649	72053597	0.000158489
Pla2g4b	1.72668	Up	Chr3	111832803	111833526	0.000630957
Parp2	1.72548	Up	Chr15	27749231	27749500	0.00676083
Vegfa	1.7219	Up	Chr9	17340439	17344324	1.94984e-07
Loxl4	1.72071	Up	Chr1	261835059	261835209	0.0154882
Tnrc18	1.72071	Up	Chr12	13847413	13860935	1.09648e-08
Amotl2	1.71713	Up	Chr8	111223776	111224626	0.000398107
Fzd5	1.71713	Up	Chr9	71445150	71445492	0.0144544
Ddx28	1.71475	Up	Chr19	37990105	37990304	0.0380189
Hlcs	1.71356	Up	Chr11	34499834	34500434	0.00398107
Creb1	1.71238	Up	Chr9	71262371	71293606	3.54813e-05
Akap6	1.71119	Up	Chr6	73645533	73652731	0.000457088
Celsr2	1.71119	Up	Chr2	211206710	211207059	0.017378
Pcdhgb7	1.71	Up	Chr18	30901756	30902650	7.76247e-05
Arhgef4	1.70882	Up	Chr9	41209689	41216564	0.0363078
Pnkp	1.70645	Up	Chr1	100858627	100859103	0.0162181
Zc3h18	1.70645	Up	Chr19	55197446	55197909	0.0380189
Tnfrsf11b	1.70527	Up	Chr7	93807936	93808236	0.00812831
Efnb2	1.70409	Up	Chr16	86671663	86672050	0.00107152
Ccdc17	1.70173	Up	Chr5	135441120	135441817	0.000102329
Fscn2	1.70055	Up	Chr10	109533974	109534124	0.0301995
Ammecr1l	1.69819	Up	Chr18	24558694	24559860	0.0269153
Dchs1	1.69819	Up	Chr1	170614300	170614799	0.00707946
Irf8	1.69819	Up	Chr19	54334402	54335262	0.00346737
Sh2b2	1.69819	Up	Chr12	23486088	23486438	0.00562341
Nfkbil1	1.69702	Up	Chr20	4838203	4839202	1.47911e-05
Peak1	1.69114	Up	Chr8	60919508	60919859	0.000537032
Lpar3	1.68997	Up	Chr2	252157573	252157923	0.00301995
Ctif	1.68763	Up	Chr18	71467528	71467677	0.0151356
Zfp407	1.68763	Up	Chr18	81428600	81428950	0.0144544
Arid2	1.68646	Up	Chr7	137763416	137770679	7.24436e-06
Htt	1.68646	Up	Chr14	81105238	81105638	0.000380189
Rreb1	1.68646	Up	Chr17	27556076	27556677	0.00416869
Parm1	1.68529	Up	Chr14	18076675	18076822	0.0177828
Zfp316	1.68529	Up	Chr12	13354285	13362629	0.00380189
Loxl1	1.68413	Up	Chr8	63090947	63092075	1.23027e-06
Phf20	1.68413	Up	Chr3	152378194	152378345	0.0501187
Cpsf3l	1.68179	Up	Chr5	173333607	173334040	0.00891251
Atg13	1.68063	Up	Chr3	80583780	80584791	0.00128825
Sytl2	1.67946	Up	Chr1	156397513	156439978	0.0120226
Gngt2	1.67714	Up	Chr10	83656488	83658505	0.00724436
Nlrp3	1.67597	Up	Chr10	45917096	45917246	0.020893
Zfp407	1.67481	Up	Chr18	81428051	81428501	0.00346737
Zfp629	1.67481	Up	Chr1	199060904	199064123	0.000131826
Psd4	1.67365	Up	Chr3	1512167	1514047	0.00120226
Mlh3	1.67133	Up	Chr6	109091805	109092604	0.0020893
Psd2	1.67133	Up	Chr18	28794956	28796349	1.31826e-06
Rara	1.67018	Up	Chr10	86860713	86870656	7.4131e-05
Maml1	1.66786	Up	Chr10	35767698	35768841	8.91251e-08
Nlrx1	1.66786	Up	Chr8	48595039	48597905	0.000295121
Tet2	1.66786	Up	Chr2	238744744	238744895	0.040738
Fam19a3	1.66671	Up	Chr2	207251431	207251730	0.0154882
Pdzd2	1.66324	Up	Chr2	62411183	62411782	0.000354813
Sfn	1.66209	Up	Chr5	151823665	151824302	4.0738e-07
Fgd6	1.66094	Up	Chr7	34960906	34961504	0.00114815
Gtf3c4	1.66094	Up	Chr3	7409965	7422680	1e-12
Lars2	1.66094	Up	Chr8	132534140	132537076	0.00018197
Zfp518a	1.65979	Up	Chr1	260171494	260173526	2.13796e-09
Mtcl1	1.65864	Up	Chr9	114544400	114619574	1.20226e-08
Tbc1d24	1.65749	Up	Chr10	13557400	13560870	0.000204174
Limd1	1.65634	Up	Chr8	132553966	132554616	6.30957e-06
Slamf8	1.65634	Up	Chr13	90968059	90974477	1.1749e-06
Fbxo18	1.65519	Up	Chr17	70412661	70412861	0.0138038
Phyhd1	1.65519	Up	Chr3	8832582	8832805	0.0275423
Cyth4	1.65405	Up	Chr7	119826061	119828292	0.011749
Fam135a	1.65405	Up	Chr9	30277248	30277599	0.00316228
Frmd4a	1.6529	Up	Chr17	77649528	77649727	0.0186209
Ahnak	1.65176	Up	Chr1	225202710	225203011	0.000151356
Apobr	1.65176	Up	Chr1	197999406	198002226	0
Slc1a5	1.65176	Up	Chr1	78711382	78711533	0.040738
Zfp952	1.65176	Up	Chr7	15278150	15280471	9.12011e-05
Ino80d	1.65061	Up	Chr9	69830648	69833787	5.01187e-11
Nfib	1.65061	Up	Chr5	100471815	100474387	0.0346737
Nudt12	1.65061	Up	Chr9	105689960	105690258	0.018197
Brpf1	1.64947	Up	Chr4	145274650	145275165	0.0123027
Rbm14	1.64832	Up	Chr1	220056241	220056639	0.00331131
Rhbdl3	1.64832	Up	Chr10	67729221	67729572	0.0125893
Sbno2	1.64832	Up	Chr7	12492267	12493613	2.51189e-07
Tsc22d1	1.64832	Up	Chr15	58556427	58556578	0.000104713
Zfp770	1.64832	Up	Chr3	105661249	105661597	0.0169824
Rab11fip1	1.64718	Up	Chr16	69067111	69067461	0.00562341
Urb2	1.64718	Up	Chr19	56810027	56810474	0.00218776
Zc3h3	1.64718	Up	Chr7	116869993	116871088	9.54993e-06
Hivep1	1.6449	Up	Chr17	22307067	22308364	1.65959e-07
Kcnq5	1.6449	Up	Chr9	27566559	27567598	0.000223872
Asb7	1.64376	Up	Chr1	127558044	127589486	6.76083e-05
Adcy7	1.64148	Up	Chr19	19705205	19707083	0.000870964
Hgh1	1.64148	Up	Chr7	117434565	117434763	0.0239883
Kcne4	1.64148	Up	Chr9	84689780	84691026	1.23027e-06
Fam65b	1.63921	Up	Chr17	42359405	42359854	0.000707946
Kti12	1.63921	Up	Chr5	128464083	128464722	0.00104713
Taf4b	1.63807	Up	Chr18	6230084	6233239	0.0107152
Adcy8	1.63694	Up	Chr7	105354081	105357892	0.0190546
Rnf213	1.63694	Up	Chr10	108578983	108580532	1e-11
Clic6	1.63354	Up	Chr11	32655751	32656098	0.0047863
Cxcl14	1.63354	Up	Chr17	9117361	9117509	5.49541e-05
Lima1	1.63127	Up	Chr7	141469735	141470135	0.0040738
Ppara	1.63127	Up	Chr7	126678810	126681788	0.0398107
Kmt2a	1.62902	Up	Chr8	49128984	49129883	2.81838e-06
Map6	1.62676	Up	Chr1	164227121	164227271	0.0177828
Adamts9	1.62225	Up	Chr4	124767676	124771951	0.0169824
Gpr132	1.62225	Up	Chr6	137653701	137653951	0.0186209
Pclo	1.62225	Up	Chr4	17052740	17053190	0.0057544
Pygo1	1.62225	Up	Chr8	79622318	79625188	7.24436e-05
Ncf4	1.62113	Up	Chr7	119499033	119499279	0.00489779
Plag1	1.62001	Up	Chr5	16793480	16794081	0.0138038
Purg	1.62001	Up	Chr16	62481684	62482934	0.000169824
Vps54	1.62001	Up	Chr14	106167738	106167938	0.0104713
Gimap5	1.61888	Up	Chr4	78378279	78384447	5.01187e-05
Sox11	1.61888	Up	Chr6	46630755	46631889	6.16595e-09
Syne3	1.61888	Up	Chr6	128640030	128641373	3.0903e-06
Inpp5e	1.61664	Up	Chr3	3854668	3855709	6.91831e-06
Fgf7	1.61552	Up	Chr3	118316799	118317098	0.0234423
Fosb	1.61552	Up	Chr1	80220973	80221417	0.000204174
Lrrk1	1.61552	Up	Chr1	127170936	127174945	0.00141254
Ngf	1.61552	Up	Chr2	204886615	204939425	1.20226e-09
Ptgfrn	1.61552	Up	Chr2	203445052	203457342	0.00549541
Tmem145	1.61552	Up	Chr1	82183532	82183878	0.0047863
Ahnak2	1.6144	Up	Chr6	137347109	137348908	4.0738e-07
Rassf2	1.61217	Up	Chr3	124576073	124576223	0.0275423
Fat4	1.61105	Up	Chr2	125755357	125755707	0.0060256
Rpap2	1.61105	Up	Chr14	3175572	3183093	0.0489779
Slf2	1.61105	Up	Chr1	264682786	264683187	0.0104713
Zfp282	1.61105	Up	Chr4	77554418	77557139	0.00162181
Txlng	1.60993	Up	ChrX	33645932	33646083	0.0416869
Fgd5	1.60882	Up	Chr4	123873850	123874993	0.000933254
Kremen1	1.6077	Up	Chr14	85441307	85441603	0.0125893
Cep350	1.60659	Up	Chr13	73573884	73579378	1.09648e-09
Maml3	1.60659	Up	Chr2	141024728	141025223	0.00144544
Xirp1	1.60547	Up	Chr8	128705424	128705874	1.99526e-06
Acin1	1.60325	Up	Chr15	33311435	33311585	0.0446684
Dennd3	1.60325	Up	Chr7	114784957	114787350	0.00109648
Galnt4	1.60214	Up	Chr7	41306233	41308226	3.98107e-11
Lats1	1.59992	Up	Chr1	1803205	1805332	2.23872e-08
Tiam2	1.59992	Up	Chr1	44330180	44330431	0.0338844
Extl1	1.59881	Up	Chr5	152574446	152574695	0.00251189
Pclo	1.59881	Up	Chr4	16649128	16650484	0.000398107
Usf3	1.5977	Up	Chr11	61435518	61436816	3.63078e-07
Gfod1	1.5966	Up	Chr17	23923992	23924293	0.0125893
Zfp827	1.5966	Up	Chr19	32528562	32528912	0.0389045
Col8a1	1.59549	Up	Chr11	45004479	45005219	0.00416869
Zfp292	1.59549	Up	Chr5	50289955	50295426	1.51356e-05
Tbc1d10b	1.59438	Up	Chr1	198648639	198652426	0.000954993
Gltscr1l	1.59328	Up	Chr9	16470993	16481987	1.99526e-06
Ikbkg	1.59328	Up	ChrX	156257334	156260874	0.00301995
Mcm7	1.59328	Up	Chr12	19306664	19307108	0.0301995
Rnf213	1.59328	Up	Chr10	108581529	108582129	0.000144544
Tab3	1.59328	Up	ChrX	54066549	54067544	3.16228e-05
Adar	1.59218	Up	Chr2	189066507	189066707	0.0194984
Lats1	1.58997	Up	Chr1	1802806	1803106	0.000691831
Hmgn5b	1.58887	Up	Chr1	124479113	124485088	5.12861e-08
Lrrc8a	1.58557	Up	Chr3	8803649	8816986	0.00457088
Rrnad1	1.58557	Up	Chr2	187296031	187296992	0.0436516
Pclo	1.58447	Up	Chr4	16668937	16669288	0.0112202
G2e3	1.58337	Up	Chr6	72119200	72119999	0.00213796
Fbxo30	1.58118	Up	Chr1	5379625	5380916	8.31764e-09
Zfp275	1.58118	Up	ChrX	157462835	157463504	0.0371535
Agpat4	1.58008	Up	Chr1	48716143	48716640	0.00239883
Cd163	1.57899	Up	Chr4	156758914	156760060	0.0177828
Chst3	1.57899	Up	Chr20	29734819	29734970	0.0363078
Col6a3	1.57899	Up	Chr9	97969738	97969938	0.040738
Niacr1	1.57789	Up	Chr12	38160561	38161546	4.67735e-07
Socs3	1.57789	Up	Chr10	106974710	106975909	3.0903e-06
Foxm1	1.57571	Up	Chr4	161694400	161695346	0.00537032
Helz2	1.57571	Up	Chr3	176742791	176743091	0.00275423
Abcb1a	1.57462	Up	Chr4	22339878	22340328	0.0288403
Dcaf10	1.57462	Up	Chr5	60932654	60934164	0.00040738
Antxr2	1.57352	Up	Chr14	13191814	13192260	0.00151356
Phldb2	1.57352	Up	Chr11	57404674	57405474	0.00831764
Rrp1b	1.57352	Up	Chr20	10867741	10867891	0.0457088
Bptf	1.57243	Up	Chr10	95299025	95328463	1.41254e-06
Ehmt1	1.57243	Up	Chr3	2037663	2060098	0.000269153
Jrk	1.57243	Up	Chr7	115943085	115945083	1.38038e-06
Magi3	1.57243	Up	Chr2	206535865	206541098	0.0109648
Myh6	1.57243	Up	Chr15	33616915	33617703	0.00831764
Ptgir	1.57243	Up	Chr1	78835491	78835783	0.00331131
Sh3rf1	1.57243	Up	Chr16	32121006	32227427	0.00199526
Wdr24	1.57243	Up	Chr10	15191525	15191675	0.042658
Chrna4	1.57135	Up	Chr3	176537380	176538173	0.0011749
Esr2	1.57135	Up	Chr6	99164450	99165298	0.000524807
Qprt	1.57135	Up	Chr1	198544706	198545676	0.000977237
Adamts15	1.57026	Up	Chr8	31979038	31982394	6.76083e-09
Extl1	1.56917	Up	Chr5	152574793	152575444	0.00025704
Itpripl1	1.56917	Up	Chr3	119617068	119618994	2.18776e-09
Tusc5	1.56917	Up	Chr10	63472779	63473679	4.36516e-05
Adgrg6	1.56808	Up	Chr1	8654537	8656308	0.000263027
Fzd6	1.56808	Up	Chr7	77926851	77929436	0.000263027
Klf12	1.56808	Up	Chr15	84477578	84478957	0.0380189
Kmt2d	1.56808	Up	Chr7	140537427	140538327	1.58489e-05
Lrfn4	1.56808	Up	Chr1	219850086	219850484	0.00239883
Ubiad1	1.56808	Up	Chr5	165248423	165248622	0.030903
Tnc	1.56699	Up	Chr5	79844845	79849804	1.25893e-12
Hyal1	1.56591	Up	Chr8	116332883	116335039	7.24436e-05
Slc25a38	1.56591	Up	Chr8	128802291	128802491	0.00128825
Arhgap39	1.56482	Up	Chr7	117789564	117789814	0.0245471
Syne2	1.56482	Up	Chr6	99001561	99004552	1.44544e-07
Atxn7l1	1.56374	Up	Chr6	52671550	52672399	0.00309029
Cfb	1.56374	Up	Chr20	4536700	4537056	0.00831764
Fam135a	1.56374	Up	Chr9	30275449	30277049	1.54882e-08
Fyco1	1.56374	Up	Chr8	132885940	132889243	7.94328e-12
Nacad	1.56374	Up	Chr14	86865231	86865380	0.0323594
Pgap1	1.56374	Up	Chr9	61066268	61066663	0.0269153
Prox1	1.56266	Up	Chr13	108391322	108406753	5.01187e-13
Sipa1l3	1.56266	Up	Chr1	87332493	87344604	0.00109648
Pcnx3	1.56157	Up	Chr1	221038233	221040788	0.000123027
Socs4	1.56157	Up	Chr15	24069000	24069149	0.0239883
Hvcn1	1.56049	Up	Chr12	39822863	39825072	0.0194984
Klhl28	1.56049	Up	Chr6	86684964	86710804	4.57088e-10
Rab43	1.56049	Up	Chr4	119695061	119714041	0.00017378
Zfp451	1.56049	Up	Chr9	38432478	38433874	2.04174e-06
Acadsb	1.55833	Up	Chr1	202020144	202020492	0.0151356
Amigo3	1.55833	Up	Chr8	116830920	116832053	1.69824e-06
Ddx6	1.55833	Up	Chr8	48925389	48925974	0.00691831
Igdcc4	1.55833	Up	Chr8	70623986	70624780	0.00512861
Trio	1.55833	Up	Chr2	80648189	80652048	0.00660693
Rtel1	1.55725	Up	Chr3	176855959	176856481	0.0288403
Sell	1.55725	Up	Chr13	82369918	82373770	0.000109648
Zfp521	1.55725	Up	Chr18	5191093	5192338	0.0018197
Ednra	1.55617	Up	Chr19	33986517	33989111	0.000380189
Tbc1d24	1.55617	Up	Chr10	13551744	13552687	0.00380189
Birc6	1.55509	Up	Chr6	22033413	22044914	1.8197e-08
Pus7l	1.55509	Up	Chr7	135799928	135800471	0.00977237
Synm	1.55509	Up	Chr1	128721448	128721898	0.00954993
Vsig10	1.55509	Up	Chr12	44967339	44971780	0.0057544
Pxdn	1.55401	Up	Chr6	48927431	48928626	2.18776e-06
Bsn	1.55186	Up	Chr8	116892983	116893433	0.0251189
Map3k11	1.55186	Up	Chr1	221043514	221044009	0.0346737
Rbm33	1.54971	Up	Chr4	616081	619338	0.0177828
Nhsl2	1.54864	Up	ChrX	71969377	71973769	3.0903e-05
Rara	1.54864	Up	Chr10	86883825	86884075	0.00794328
Stard13	1.54864	Up	Chr12	1046342	1051967	3.80189e-08
Anks1a	1.54756	Up	Chr20	7635297	7635448	0.00251189
Runx1	1.54756	Up	Chr11	32858175	33002581	0.000131826
Fam179b	1.54542	Up	Chr6	86714386	86730863	5.88844e-06
Harbi1	1.54542	Up	Chr3	80616358	80623175	0.00123027
Mettl25	1.54542	Up	Chr7	47914371	47914622	0.0323594
Tnfsf9	1.54542	Up	Chr9	9910086	9911405	0.0011749
Zbtb46	1.54542	Up	Chr3	176914979	176926655	0.000144544
Col6a3	1.54435	Up	Chr9	97962708	97969540	5.24807e-10
Sh3bp5l	1.54435	Up	Chr10	43769285	43769535	0.00309029
Med13l	1.54328	Up	Chr12	43440699	43447049	8.51138e-09
Zfp319	1.54221	Up	Chr19	10121932	10123232	2.95121e-07
Dio2	1.54114	Up	Chr6	114488946	114489443	0.00057544
Gcnt6	1.54007	Up	Chr17	21738551	21739197	1.65959e-06
St18	1.53901	Up	Chr5	12493048	12504381	0.00104713
Usp16	1.53901	Up	Chr11	27104590	27110324	0.000467735
Zbtb10	1.53901	Up	Chr2	94717153	94730027	2.04174e-05
Zfp276	1.53901	Up	Chr19	56054696	56054846	0.00776247
Ahnak2	1.53794	Up	Chr6	137340916	137342665	1.44544e-07
Zfp516	1.53794	Up	Chr18	79814015	79841765	3.16228e-12
Dusp16	1.53688	Up	Chr4	168516767	168517317	0.00120226
Gltscr1	1.53688	Up	Chr1	77877192	77885072	0.00128825
Sacs	1.53688	Up	Chr15	41518989	41521484	3.98107e-12
Bcl6	1.53368	Up	Chr11	80271381	80271532	0.0436516
Fzd3	1.53368	Up	Chr15	48601455	48615558	0.000114815
Gzf1	1.53368	Up	Chr3	143006265	143011433	0.00020893
Ptprr	1.53368	Up	Chr7	59307336	59325177	0.0269153
Wnk1	1.53368	Up	Chr4	152577969	152578169	0.0131826
Prrx1	1.53262	Up	Chr13	81156752	81162336	0.0134896
Bend3	1.53156	Up	Chr20	48266378	48267672	4.16869e-07
Pcdhb22	1.53156	Up	Chr18	30592610	30593459	0.000912011
Fbrs	1.5305	Up	Chr1	198930809	198932369	0.0107152
Ston2	1.5305	Up	Chr6	115408676	115408876	0.0275423
Eid3	1.52944	Up	Chr7	26976497	26976792	0.00060256
Maml3	1.52944	Up	Chr2	140734285	140735078	0.000851138
Ankrd13b	1.52838	Up	Chr10	62690951	62691101	0.047863
Gcnt2	1.52838	Up	Chr17	21635793	21677128	6.30957e-13
Parp9	1.52838	Up	Chr11	67746042	67752896	8.70964e-05
Wdr46	1.52838	Up	Chr20	5452223	5452617	0.0114815
Bmp1	1.52732	Up	Chr15	52166450	52166951	0.0141254
Cdsn	1.52732	Up	Chr20	3704924	3707266	3.0903e-09
Scly	1.52732	Up	Chr9	98457226	98459025	7.07946e-06
Sp110	1.52732	Up	Chr9	92594007	92595604	0.0141254
Zbed5	1.52732	Up	Chr12	30308567	30309709	2.69153e-05
Adamts5	1.52626	Up	Chr11	25455594	25456440	0.000158489
Dll1	1.52626	Up	Chr1	57318966	57321574	6.16595e-05
Zbed4	1.52626	Up	Chr7	129783752	129785598	3.71535e-07
Il6r	1.5252	Up	Chr2	189207910	189211195	3.80189e-06
Nf1x	1.5252	Up	Chr19	25841022	25888053	0.000512861
Csf3r	1.52414	Up	Chr5	144031502	144032142	0.0331131
Fnip2	1.52414	Up	Chr2	178248004	178249249	1.62181e-07
Usf3	1.52309	Up	Chr11	61436914	61475686	6.30957e-15
Aldh3a2	1.52098	Up	Chr10	47526633	47526784	0.0275423
Kmt2a	1.52098	Up	Chr8	49114797	49116211	0.0109648
Cebpa	1.51887	Up	Chr1	91364332	91365917	0.000131826
Mettl13	1.51887	Up	Chr13	80438855	80441204	4.89779e-05
Asb6	1.51782	Up	Chr3	9659855	9661280	5.62341e-07
Fat1	1.51677	Up	Chr16	50437504	50498791	0
Nfatc2	1.51677	Up	Chr3	165242596	165243943	0.000724436
Trib2	1.51467	Up	Chr6	41016820	41017119	0.0204174
Scn10a	1.51152	Up	Chr8	128298642	128299739	3.38844e-08
B4galt4	1.51047	Up	Chr11	64573878	64583906	0.0147911
Bnc2	1.51047	Up	Chr5	102416353	102433323	0.000125893
Zfp318	1.51047	Up	Chr9	16962735	16975214	2.39883e-05
Hivep2	1.50943	Up	Chr1	8314942	8315243	0.0251189
Nav1	1.50943	Up	Chr13	52359620	52435639	3.46737e-08
Akap13	1.50733	Up	Chr1	137175106	137179665	2.29087e-06
Nes	1.50733	Up	Chr2	187352722	187352922	0.00169824
Scaf1	1.50733	Up	Chr1	101007405	101008204	0.00263027
Enah	1.50629	Up	Chr13	100347438	100352930	0.0489779
Glis3	1.50629	Up	Chr1	246380864	246400269	0.000758578
Gpatch3	1.50629	Up	Chr5	151799687	151806007	0.000147911
Zbtb37	1.50629	Up	Chr13	78836937	78837285	0.011749
Zfp324	1.50629	Up	Chr1	65606914	65609288	0.000645654
Pard3	1.50525	Up	Chr19	60322448	60324030	0.00501187
Zfand4	1.50525	Up	Chr4	148256847	148269526	8.51138e-05
Fut4	1.5042	Up	Chr8	13260054	13260798	0.0123027
Rnf220	1.5042	Up	Chr5	136166692	136344586	0.0128825
Tagap	1.5042	Up	Chr1	47494634	47495727	0.0060256
Ttbk2	1.5042	Up	Chr3	112689884	112695570	5.12861e-07
Sgsh	1.50316	Up	Chr10	108469410	108470303	0.017378
Soga1	1.50316	Up	Chr3	153130466	153140590	2.45471e-09
Fastkd3	1.50212	Up	Chr1	37740508	37742138	0.00025704
Irak2	1.50212	Up	Chr4	145650320	145650669	0.00512861
Nepro	1.50108	Up	Chr11	60919574	60924374	0.000436516
Sox11	1.50004	Up	Chr6	46630360	46630608	0.0128825
Arl11	1.499	Up	Chr15	41643578	41645587	6.91831e-05
Crybg3	1.499	Up	Chr11	42895909	42946635	0
Snx19	1.499	Up	Chr8	31497729	31499121	7.94328e-10
Syk	1.499	Up	Chr17	12616543	12623016	6.91831e-05
Urb1	1.499	Up	Chr11	30941747	30943797	0.00057544
Hspa1a	1.49796	Up	Chr20	4877686	4878430	2.75423e-10
Bdkrb1	1.49692	Up	Chr6	129440461	129440809	3.63078e-08
Ubn2	1.49692	Up	Chr4	66214548	66232958	2.18776e-09
Pclo	1.49589	Up	Chr4	16648328	16649029	0.00489779
